# Supplementary material for: Analysis of Microbial Diversity and Metabolites in Sauerkraut Products with and without Microorganism Addition
Source: MDPI journal article supplement (doi:10.3390/foods12061164), 2023-03-09
Supplement: s1 [file s1]

**Table S1.** Relative amino acid contents.

**Table S2.** Relative contents of organic acids.

**Table S3.** List of compounds in sauerkraut.

Table S1

| Amino acid             | LLS    | HX     | ZLL    | QM     |
|------------------------|--------|--------|--------|--------|
| Aminobutyric acid      | 20.81% | 5.70%  | 3.07%  | 13.15% |
| Phenylalanine          | 16.84% | 10.69% | 18.00% | 18.11% |
| Isoleucine             | 15.03% | 11.29% | 13.42% | 18.44% |
| Leucine                | 15.03% | 11.29% | 13.42% | 18.44% |
| Tryptophan             | 13.45% | 24.04% | 11.41% | 12.76% |
| Valine                 | 4.51%  | 1.06%  | 1.18%  | 0.85%  |
| o-Phosphoethanilamine  | 3.07%  | 1.32%  | 0.64%  | 3.83%  |
| Cystine                | 2.28%  | 0.78%  | 0.31%  | 0.43%  |
| Lysine                 | 1.88%  | 0.00%  | 1.69%  | 0.92%  |
| Proline                | 1.37%  | 15.68% | 14.08% | 2.09%  |
| Methionine             | 1.35%  | 0.86%  | 1.02%  | 1.19%  |
| Ornithine              | 1.03%  | 1.33%  | 1.61%  | 0.98%  |
| 1-Methylhistidine      | 0.60%  | 10.85% | 17.19% | 6.52%  |
| threonine              | 0.54%  | 0.00%  | 0.34%  | 0.43%  |
| Alanine                | 0.49%  | 0.20%  | 0.10%  | 0.34%  |
| plusallo-σ-            | 0.47%  | 0.31%  | 0.15%  | 0.26%  |
| Hydroxylysine          |        |        |        |        |
| Tyrosine               | 0.44%  | 0.34%  | 0.10%  | 0.13%  |
| Glutamine              | 0.17%  | 0.27%  | 0.04%  | 0.08%  |
| Asparagine             | 0.17%  | 0.69%  | 0.16%  | 0.33%  |
| Arginine               | 0.15%  | 1.14%  | 0.57%  | 0.00%  |
| alpha-Aminoadipic acid | 0.12%  | 0.25%  | 0.09%  | 0.27%  |
| o-Phosphoserine        | 0.11%  | 0.10%  | 0.13%  | 0.00%  |
| Theanine               | 0.09%  | 0.55%  | 0.23%  | 0.00%  |

|                   |       |       |       |       |
|-------------------|-------|-------|-------|-------|
| hydroxy-L-proline | 0.00% | 0.22% | 0.19% | 0.00% |
| Cystathionine     | 0.00% | 0.89% | 0.73% | 0.45% |
| Histidine         | 0.00% | 0.13% | 0.13% | 0.00% |

Table S2

| Organic acids     | LLS    | HX     | ZLL    | QM     |
|-------------------|--------|--------|--------|--------|
| Oxalic acid       | 3.40%  | 0.08%  | 0.25%  | 0.61%  |
| Tartaric acid     | 0.78%  | 0.67%  | 0.63%  | 1.79%  |
| Pyruvic acid      | 1.19%  | 1.36%  | 1.15%  | 1.54%  |
| Malic acid        | 0.13%  | 0.00%  | 0.27%  | 0.02%  |
| Lactic acid       | 0.42%  | 0.62%  | 0.20%  | 2.56%  |
| Acetic acid       | 0.00%  | 0.00%  | 0.02%  | 0.01%  |
| Pyroglutamic acid | 16.14% | 39.95% | 39.08% | 27.65% |
| Citric acid       | 0.11%  | 1.01%  | 0.03%  | 0.03%  |
| Butanedioic acid  | 77.53% | 56.18% | 58.29% | 65.48% |
| Fumaric acid      | 0.04%  | 0.04%  | 0.01%  | 0.01%  |
| Ascorbic acid     | 0.25%  | 0.08%  | 0.07%  | 0.30%  |

Table S3

| Count | Compound          | CAS#      | Formula      | MW    | RI     | Rt [sec] | Dt [RIPrel] | Comment |
|-------|-------------------|-----------|--------------|-------|--------|----------|-------------|---------|
| 1     | Linalool oxide    | C60047178 | C10H18O<br>2 | 170.3 | 1085.5 | 772.427  | 1.2535      |         |
| 2     | (E)-2-Octenal     | C2548870  | C8H14O       | 126.2 | 1055.5 | 731.308  | 1.3272      |         |
| 3     | 1,8-Cineole       | C470826   | C10H18O      | 154.3 | 1038.6 | 706.95   | 1.7186      | dimer   |
| 4     | 2-Ethyl-1-hexanol | C104767   | C8H18O       | 130.2 | 1022.4 | 682.458  | 1.4013      |         |
| 5     | Heptanol          | C53535334 | C7H16O       | 116.2 | 974    | 599.627  | 1.3991      |         |
| 6     | 2-Hexanol         | C626937   | C6H14O       | 102.2 | 972    | 595.796  | 1.5631      | dimer   |

|    |                                           |           |                |       |        |         |        |         |
|----|-------------------------------------------|-----------|----------------|-------|--------|---------|--------|---------|
| 7  | 3-Methyl<br>valeric acid                  | C105431   | C6H12O2        | 116.2 | 933    | 523.158 | 1.5999 |         |
| 8  | heptanal                                  | C111717   | C7H14O         | 114.2 | 930.2  | 518.015 | 1.3401 |         |
| 9  | Octanal                                   | C124130   | C8H16O         | 128.2 | 995.1  | 637.633 | 1.385  |         |
| 10 | 3-<br>Furanmethan<br>ol                   | C4412913  | C5H6O2         | 98.1  | 981.4  | 613.206 | 1.1081 |         |
| 11 | Diethylene<br>glycol<br>dimethyl<br>ether | C111966   | C6H14O3        | 134.2 | 964.3  | 581.618 | 1.1565 | monomer |
| 12 | 2-<br>Acetylthiazole                      | C24295032 | C5H5NO<br>S    | 127.2 | 1027.8 | 690.812 | 1.1138 |         |
| 13 | (E)-2-Hexenal                             | C6728263  | C6H10O         | 98.1  | 861.2  | 408.61  | 1.1898 |         |
| 14 | 5-Methyl-3-<br>heptanone                  | C541855   | C8H16O         | 128.2 | 933.4  | 523.883 | 1.2835 | monomer |
| 15 | (E)-2-<br>Heptenal                        | C18829555 | C7H12O         | 112.2 | 950.3  | 555.41  | 1.2534 | monomer |
| 16 | Diethylene<br>glycol<br>dimethyl<br>ether | C111966   | C6H14O3        | 134.2 | 947.1  | 549.261 | 1.1742 | diner   |
| 17 | 2,6-<br>dimethylpyra<br>zine              | C108509   | C6H8N2         | 108.1 | 922.5  | 504.143 | 1.1334 |         |
| 18 | Octamethyltri<br>siloxane                 | C107517   | C8H24O2<br>Si3 | 236.5 | 859.2  | 406.009 | 1.5524 |         |
| 19 | isobutyl<br>acetate                       | C110190   | C6H12O2        | 116.2 | 756.6  | 293.048 | 1.6139 |         |

|    |                           |          |         |       |       |         |        |         |
|----|---------------------------|----------|---------|-------|-------|---------|--------|---------|
| 20 | 2-Methyl-1-pentanol       | C105306  | C6H14O  | 102.2 | 819.4 | 358.238 | 1.3039 |         |
| 21 | Methyl isovalerate        | C556241  | C6H12O2 | 116.2 | 793.7 | 330.593 | 1.2057 |         |
| 22 | Isopentan-1-ol            | C123513  | C5H12O  | 88.1  | 757.2 | 293.638 | 1.2406 |         |
| 23 | Pentanal                  | C110623  | C5H10O  | 86.1  | 735.9 | 273.357 | 1.4323 | dimer   |
| 24 | Pyrazine, 2,5-dimethyl-2- | C123320  | C6H8N2  | 108.1 | 904.5 | 473.056 | 1.5047 |         |
| 25 | Furanmethanol             | C98000   | C5H6O2  | 98.1  | 853.3 | 398.472 | 1.3899 | dimer   |
| 26 | 2-ethylfuran              | C3208160 | C6H8O   | 96.1  | 737.8 | 275.184 | 1.305  |         |
| 27 | 2-methylbutanol           | C137326  | C5H12O  | 88.1  | 735.7 | 273.169 | 1.4768 |         |
| 28 | 1-pentanol                | C71410   | C5H12O  | 88.1  | 775.7 | 312.14  | 1.51   | dimer   |
| 29 | Pentanol                  | C71410   | C5H12O  | 88.1  | 778.5 | 315.003 | 1.2514 | monomer |
| 30 | Butyl propanoate          | C590012  | C7H14O2 | 130.2 | 883.5 | 439.824 | 1.2833 |         |
| 31 | Acetic acid butyl ester   | C123864  | C6H12O2 | 116.2 | 819.3 | 358.118 | 1.6142 | dimer   |
| 32 | Acetic acid butyl ester   | C123864  | C6H12O2 | 116.2 | 819.2 | 358.05  | 1.2342 | monomer |
| 33 | ethyl-2-methyl propanoate | C97621   | C6H12O2 | 116.2 | 722.2 | 261.372 | 1.5566 | dimer   |
| 34 | ethyl-2-methyl propanoate | C97621   | C6H12O2 | 116.2 | 729.2 | 267.413 | 1.1979 | monomer |

|    |                               |          |         |       |       |         |        |         |
|----|-------------------------------|----------|---------|-------|-------|---------|--------|---------|
| 35 | Pentanal                      | C110623  | C5H10O  | 86.1  | 665.2 | 221.456 | 1.4176 | monomer |
| 36 | 2-Ethoxybutane                | C2679870 | C6H14O  | 102.2 | 623.7 | 201.273 | 1.4489 |         |
| 37 | 1-propanol                    | C71238   | C3H8O   | 60.1  | 561.3 | 175.569 | 1.2456 |         |
| 38 | 3-Pentanone                   | C96220   | C5H10O  | 86.1  | 692.5 | 238.387 | 1.1    | monomer |
| 39 | 3-Pentanone                   | C96220   | C5H10O  | 86.1  | 709.8 | 251.178 | 1.3496 | dimer   |
| 40 | 2-Propanol                    | C67630   | C3H8O   | 60.1  | 481.9 | 143.3   | 1.192  |         |
| 41 | Ethanol                       | C64175   | C2H6O   | 46.1  | 440.3 | 126.395 | 1.1372 |         |
| 42 | Propionic acid                | C79094   | C3H6O2  | 74.1  | 743.7 | 280.654 | 1.1117 |         |
| 43 | 1,2-Propanediol               | C57556   | C3H8O2  | 76.1  | 729.7 | 267.875 | 1.2689 |         |
| 44 | methyl butyrate               | C623427  | C5H10O2 | 102.1 | 742.3 | 279.357 | 1.1544 |         |
| 45 | 2-methylpropanoic acid        | C79312   | C4H8O2  | 88.1  | 767.1 | 303.432 | 1.1531 | monomer |
| 46 | 2-methylpropanoic acid        | C79312   | C4H8O2  | 88.1  | 776.8 | 313.247 | 1.3724 | dimer   |
| 47 | 2-furan methanol              | C98000   | C5H6O2  | 98.1  | 806.7 | 344.392 | 1.1334 | monomer |
| 48 | (Z)-3-hexen-1-ol              | C928961  | C6H12O  | 100.2 | 876.8 | 430.075 | 1.2306 |         |
| 49 | ethyl propanoate              | C105373  | C5H10O2 | 102.1 | 678.3 | 229.094 | 1.1408 |         |
| 50 | acetoin (3-hydroxy-2-butanone | C513860  | C4H8O2  | 88.1  | 748.9 | 285.603 | 1.3409 |         |
| 51 | Furfural                      | C98011   | C5H4O2  | 96.1  | 792.3 | 329.22  | 1.3384 |         |

|    |                            |           |         |       |        |         |        |         |
|----|----------------------------|-----------|---------|-------|--------|---------|--------|---------|
| 52 | 2,3-Butanediol             | C513859   | C4H10O2 | 90.1  | 821.8  | 360.974 | 1.3616 |         |
| 53 | Triethylamine              | C121448   | C6H15N  | 101.2 | 671    | 224.716 | 1.2193 | monomer |
| 54 | 1-butanol                  | C71363    | C4H10O  | 74.1  | 665.5  | 221.642 | 1.384  |         |
|    | 2-                         |           |         |       |        |         |        |         |
| 55 | Methylbutana               | C96173    | C5H10O  | 86.1  | 625.2  | 201.924 | 1.3927 |         |
|    | 1                          |           |         |       |        |         |        |         |
| 56 | 2-Heptanone                | C110430   | C7H14O  | 114.2 | 844.4  | 387.398 | 1.2641 |         |
| 57 | 2-cyclohexen-<br>1-one     | C930687   | C6H8O   | 96.1  | 911.5  | 484.901 | 1.4037 |         |
| 58 | Methyl<br>salicylate       | C119368   | C8H8O3  | 152.1 | 1150.8 | 860.157 | 1.2059 |         |
| 59 | hexanoic acid              | C142621   | C6H12O2 | 116.2 | 1022.9 | 683.252 | 1.3021 |         |
| 60 | Phenylacetald<br>ehyde     | C122781   | C8H8O   | 120.2 | 1020.8 | 680.001 | 1.5399 | dimer   |
| 61 | benzaldehyde               | C100527   | C7H6O   | 106.1 | 997.1  | 641.113 | 1.4789 | dimer   |
| 62 | ?alpha?-<br>Pinene         | C80568    | C10H16  | 136.2 | 975.1  | 601.706 | 1.2214 | monomer |
| 63 | Phenol                     | C108952   | C6H6O   | 94.1  | 986.8  | 622.978 | 1.0747 |         |
|    | 2-methyl-3-                |           |         |       |        |         |        |         |
| 64 | (methylthio)fu<br>ran      | C63012975 | C6H8OS  | 128.2 | 967.7  | 588.003 | 1.1135 |         |
| 65 | Methylpyrazi<br>ne<br>N,N- | C109080   | C5H6N2  | 94.1  | 824.2  | 363.675 | 1.0767 |         |
| 66 | diethylethana<br>mine      | C121448   | C6H15N  | 101.2 | 690.5  | 236.986 | 1.4722 | dimer   |
| 67 | Propyl<br>butanoate        | C105668   | C7H14O2 | 130.2 | 903.4  | 471.069 | 1.6883 |         |
| 68 | 5-Methyl-3-                | C541855   | C8H16O  | 128.2 | 934.9  | 526.631 | 1.688  | dimer   |

|    |                           |           |              |       |        |          |        |         |
|----|---------------------------|-----------|--------------|-------|--------|----------|--------|---------|
|    | heptanone                 |           |              |       |        |          |        |         |
| 69 | Octanol                   | C111875   | C8H18O       | 130.2 | 1048.1 | 720.859  | 1.4613 |         |
| 70 | 2-Methoxy-<br>vinylphenol | C7786610  | C9H10O2      | 150.2 | 1338.2 | 1111.775 | 1.2138 |         |
| 71 | 2-Octanone                | C111137   | C8H16O       | 128.2 | 974    | 599.668  | 1.3418 |         |
| 72 | Eugenol                   | C97530    | C10H12O<br>2 | 164.2 | 1341.1 | 1115.657 | 1.2883 |         |
| 73 | 2,4-<br>Heptadienal       | C5910850  | C7H10O       | 110.2 | 962.2  | 577.701  | 1.2033 |         |
| 74 | ?alpha?-<br>pinene        | C80568    | C10H16       | 136.2 | 954.3  | 562.835  | 1.6864 | polymer |
| 75 | trans-2-<br>Heptenal      | C18829555 | C7H12O       | 112.2 | 974    | 599.63   | 1.6696 |         |
| 76 | Propyl<br>disulfide       | C629196   | C6H14S2      | 150.3 | 1126.8 | 827.885  | 1.2523 |         |
| 77 | Benzaldehyde              | C100527   | C7H6O        | 106.1 | 983.8  | 617.521  | 1.1439 | monomer |
| 78 | 3-Octanol                 | C589980   | C8H18O       | 130.2 | 985.4  | 620.37   | 1.4032 |         |
| 79 | ?alpha?-<br>Pinene        | C80568    | C10H16       | 136.2 | 977.8  | 606.519  | 1.736  | polymer |
| 80 | Allylacetic<br>acid       | C591800   | C5H8O2       | 100.1 | 905.4  | 474.567  | 1.4358 |         |
| 81 | (E)-2-Pentenal            | C1576870  | C5H8O        | 84.1  | 770.6  | 306.893  | 1.1087 |         |
| 82 | butanal                   | C123728   | C4H8O        | 72.1  | 598    | 190.478  | 1.0889 |         |
| 83 | 3-<br>Butenenitrile       | C109751   | C4H5N        | 67.1  | 638.3  | 207.83   | 1.1337 |         |
| 84 | phenylacetald<br>ehyde    | C122781   | C8H8O        | 120.2 | 1041.7 | 711.552  | 1.256  | monomer |
| 85 | 1,8-Cineole               | C470826   | C10H18O      | 154.3 | 1045.4 | 716.977  | 1.2857 | monomer |
| 86 | Limonene                  | C138863   | C10H16       | 136.2 | 1038.2 | 706.456  | 1.2899 |         |

|    |               |          |        |       |       |         |        |         |
|----|---------------|----------|--------|-------|-------|---------|--------|---------|
| 87 | 2-Hexanol     | C626937  | C6H14O | 102.2 | 977.4 | 605.883 | 1.2825 | monomer |
| 88 | 1-octen-3-one | C4312996 | C8H14O | 126.2 | 973.4 | 598.536 | 1.2783 |         |
