# Supplementary material for: Analysis of Microbial Diversity and Metabolites in Sauerkraut Products with and without Microorganism Addition
Source: MDPI journal article supplement (doi:10.3390/foods12061164), 2023-03-09
Supplement: s1 [file s1]

**Figure S1.** Microbial diversity analysis of sauerkraut. (A) weighted UniFrac distance, (B) unweighted UniFrac distance, (C) principal coordinates analysis.

**Figure S2.** Targeted metabolome analysis. (A) Amino acid score plot, (B) organic acid score plot.

**Figure S3.** Analysis of volatile compounds. (A) 2D drawings, (B) differential models, (C) VOC biplot scores.

**Figure S4.** Correlations between bacterial taxa and metabolites. (A) Network diagram of amino acids and bacterial taxa, (B) Network diagram of organic acids and bacterial taxa, (C) Network diagram of VOCs and bacterial taxa.

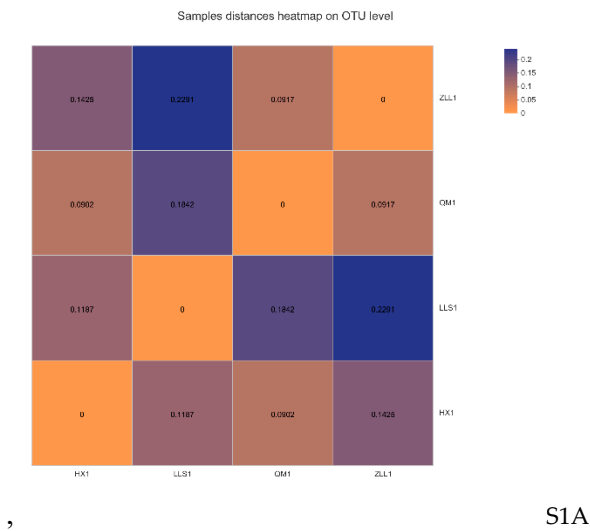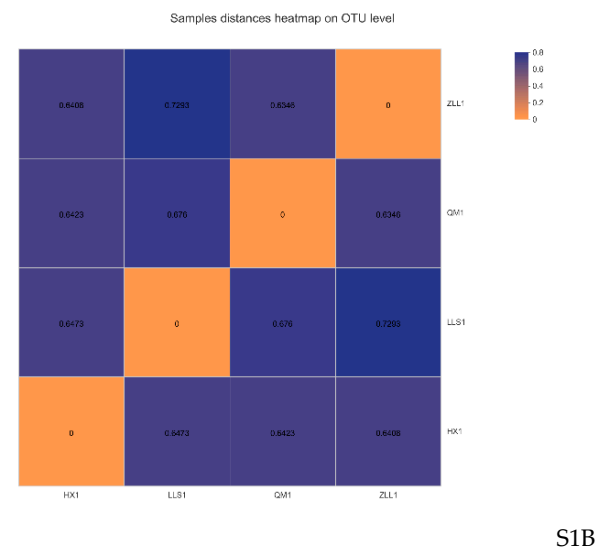

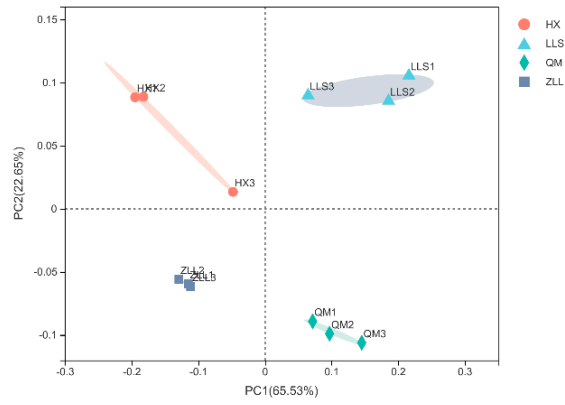

S1C

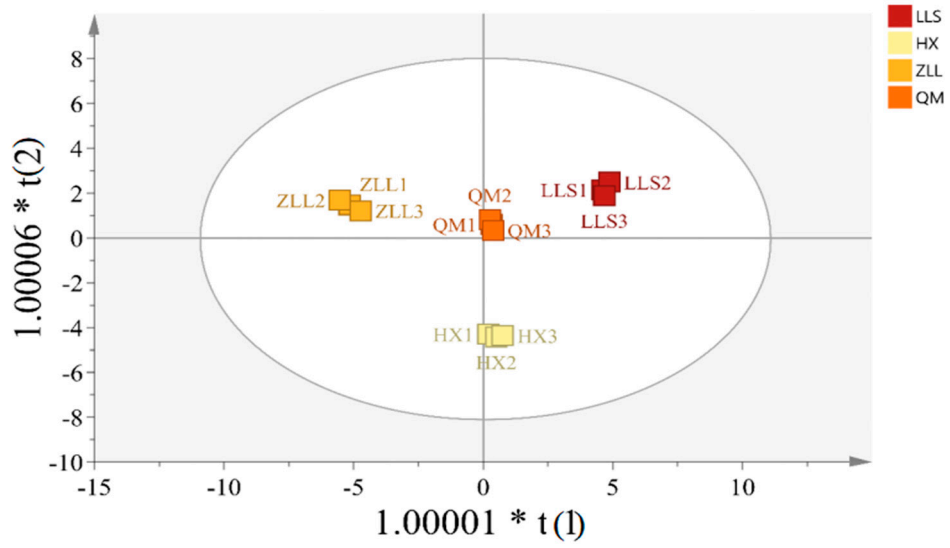

S2A

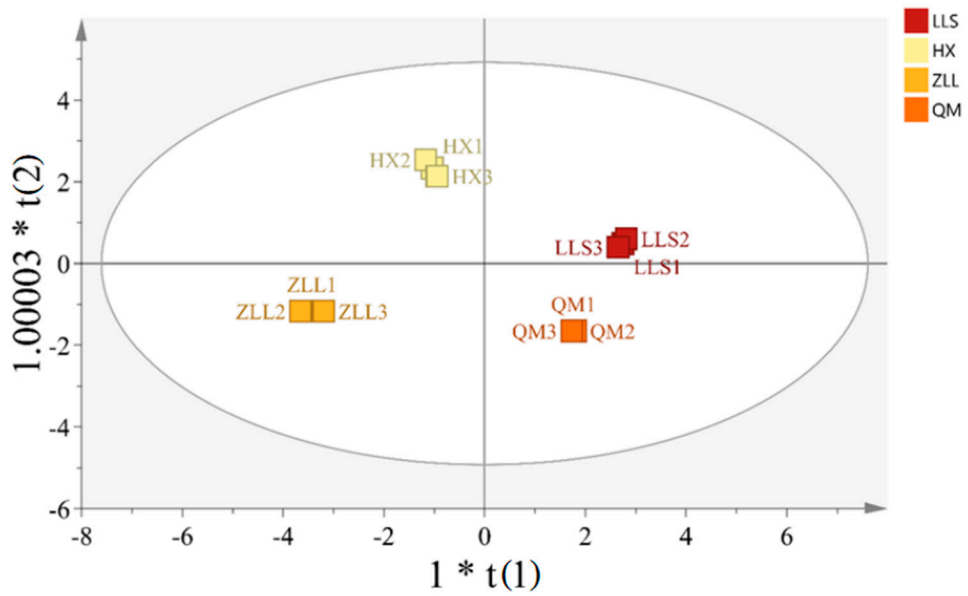

S2B

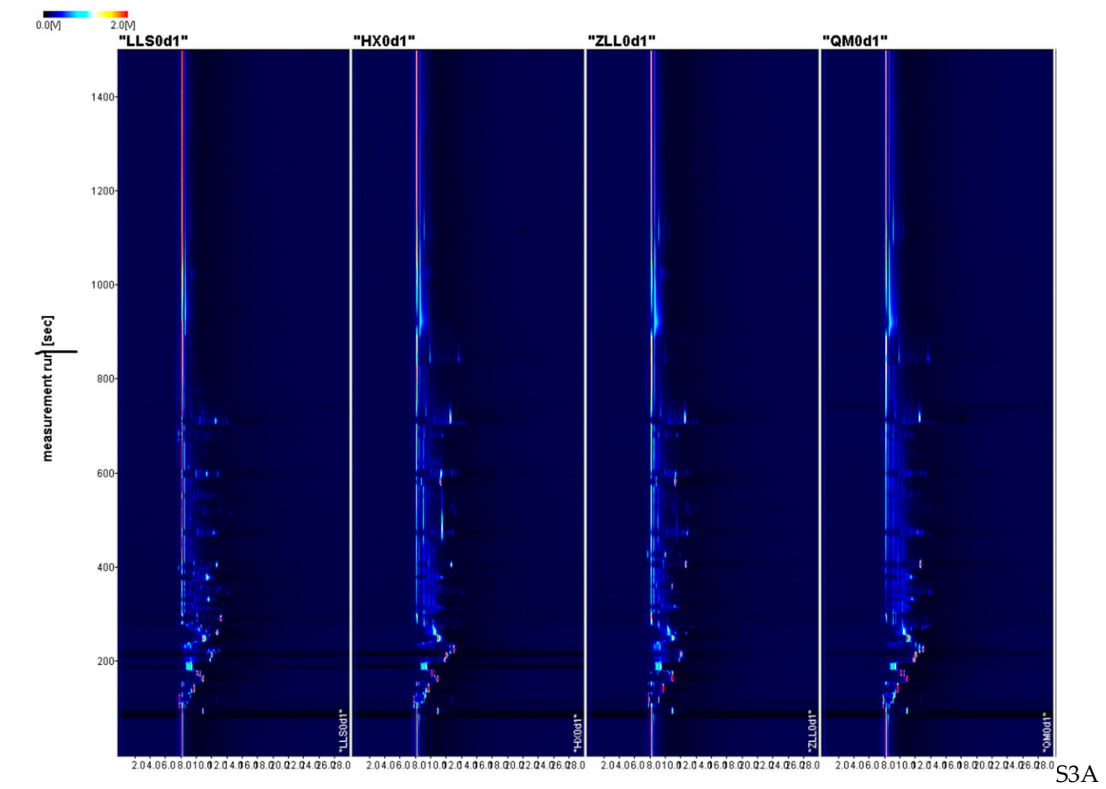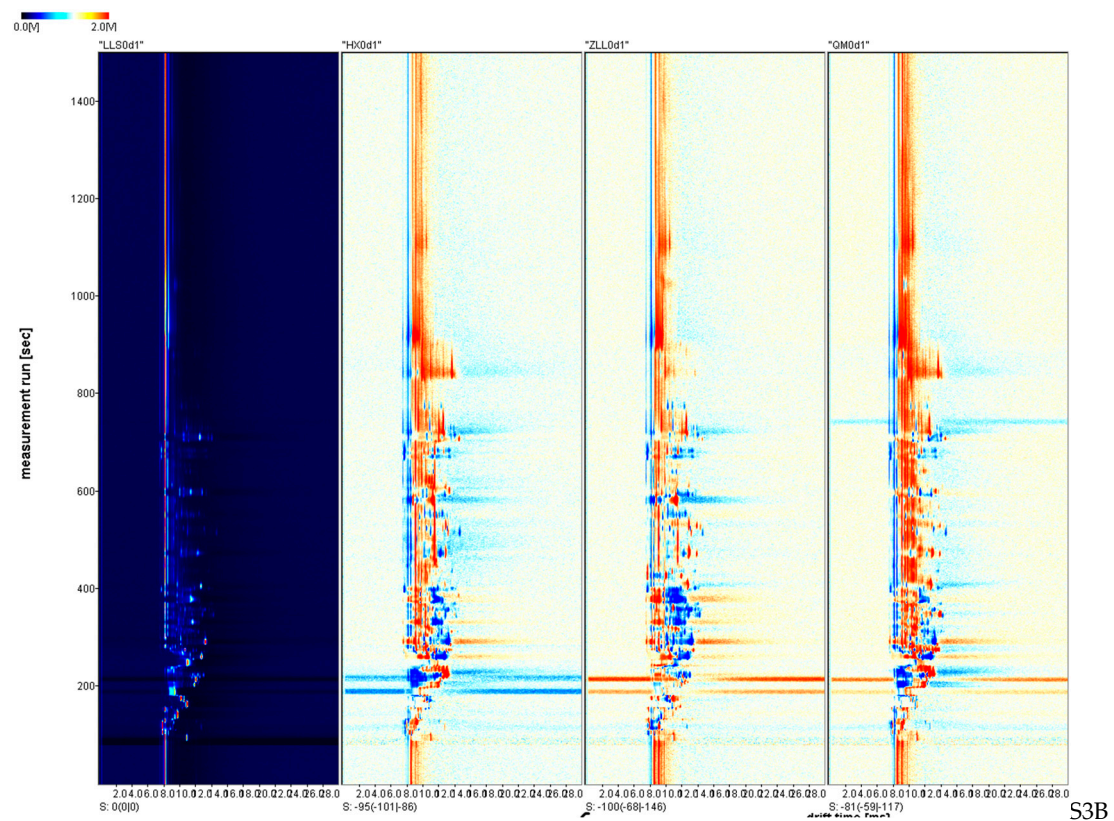

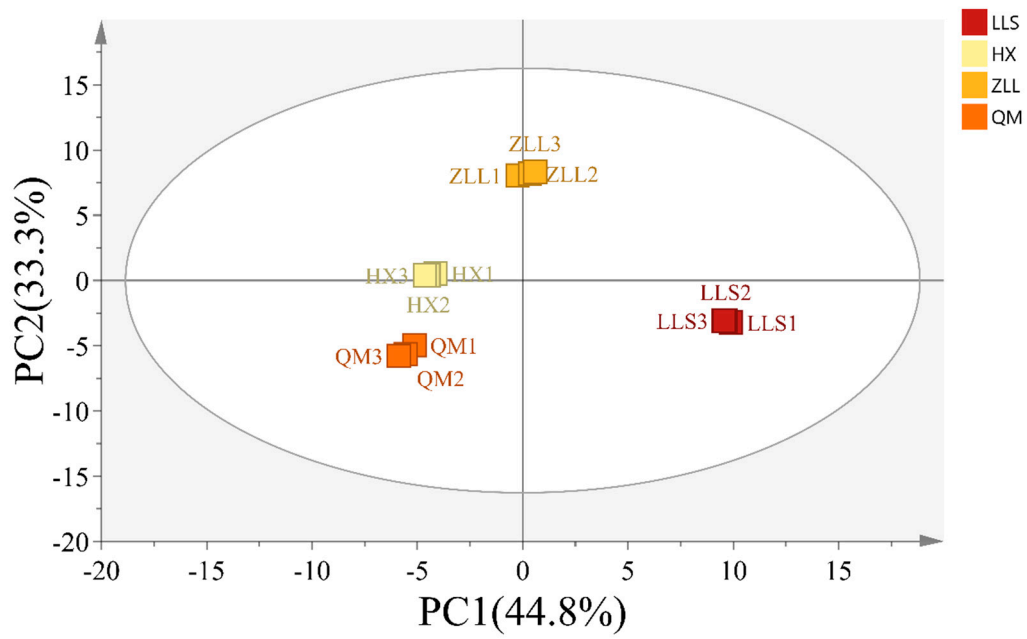

S3C

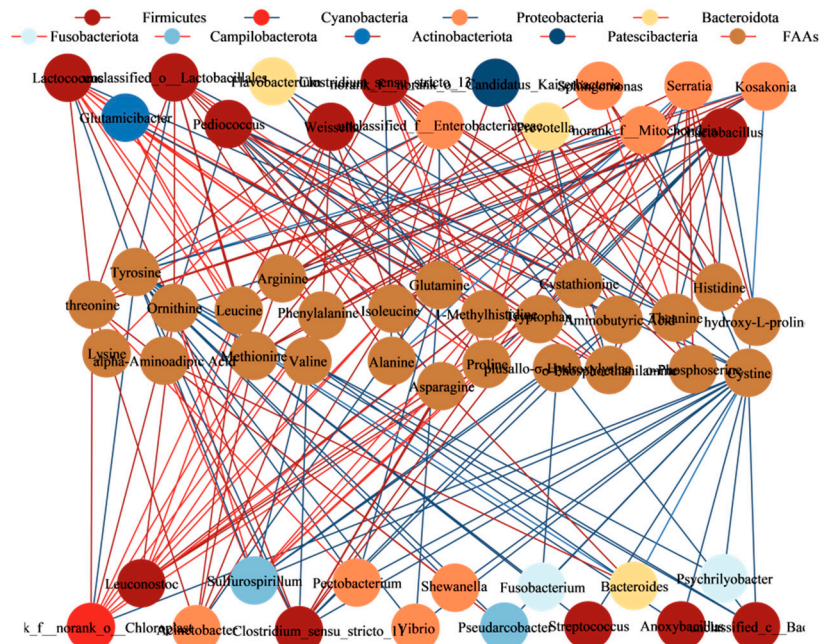

S4A

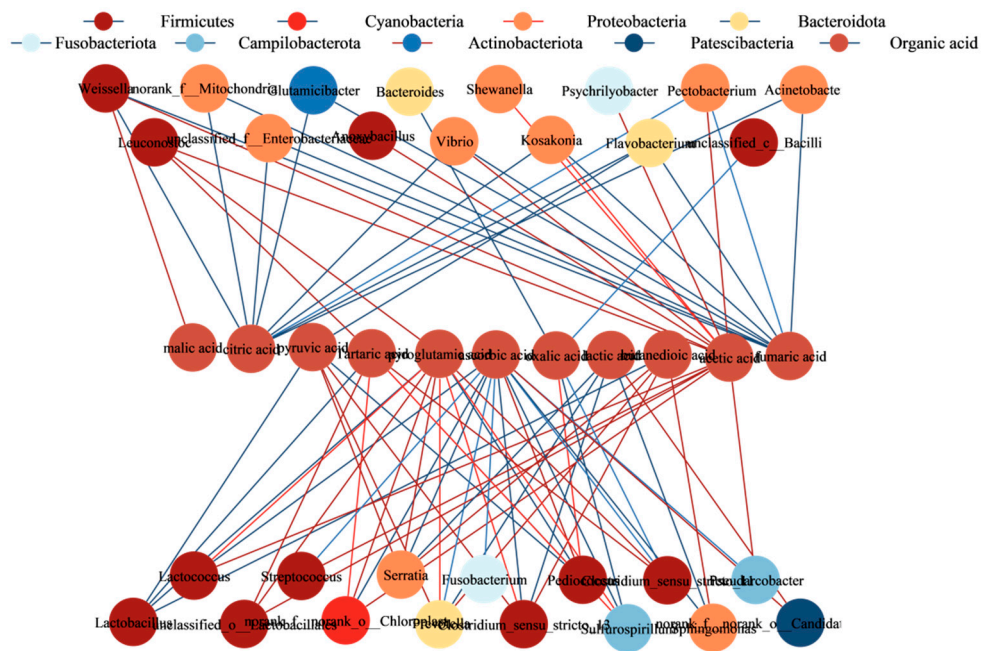

S4B

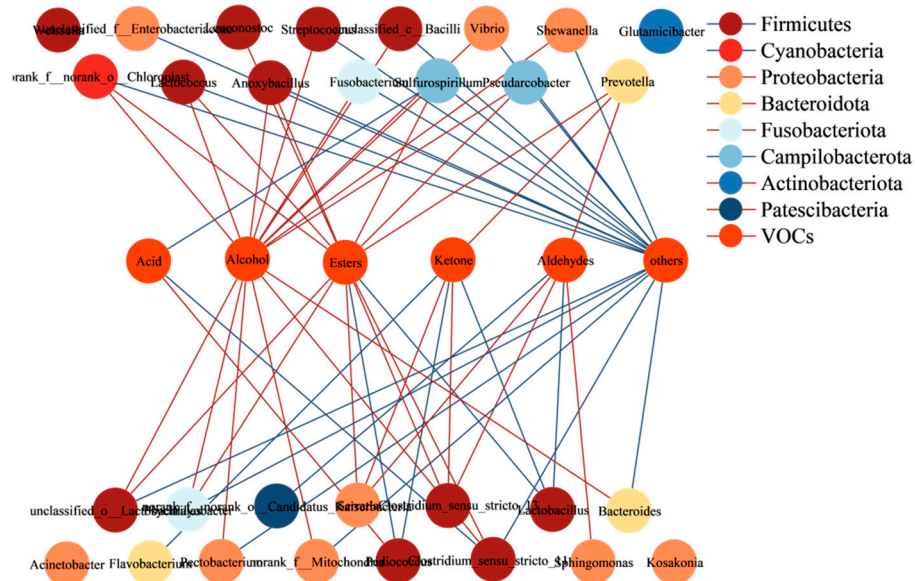

S4C
