# Supplementary material for: Analysis of Microbial Diversity and Metabolites in Sauerkraut Products with and without Microorganism Addition
Source: MDPI journal article supplement (doi:10.3390/foods12061164), 2023-03-09
Supplement: s1 [file s1]

## **Hightlights**

Different modes of microbial addition formed their own unique microbial communities;

Different strains have similar effects to inhibit *Firmicutes* production;

Fermented sauerkraut without microbes added was richer in amino acids and organic acids;

Alcohols, esters and acids were more abundant in fermented sauerkraut with microbes added;

Cystine, ascorbic acid and alcohols were closely associated with a wide range of microorganisms in sauerkraut.
